# Supplementary material for: Integration of genomics and transcriptomics highlights the crucial role of chromosome 5 open reading frame 34 in various human malignancies
Source: publisher site journal article supplement (doi:10.18632/aging.205310), 2023-12-07
Supplement: Supplementary file [file aging-v15i23-205310-supplementary-material-SD1.pdf]

SUPPLEMENTARY FIGURES

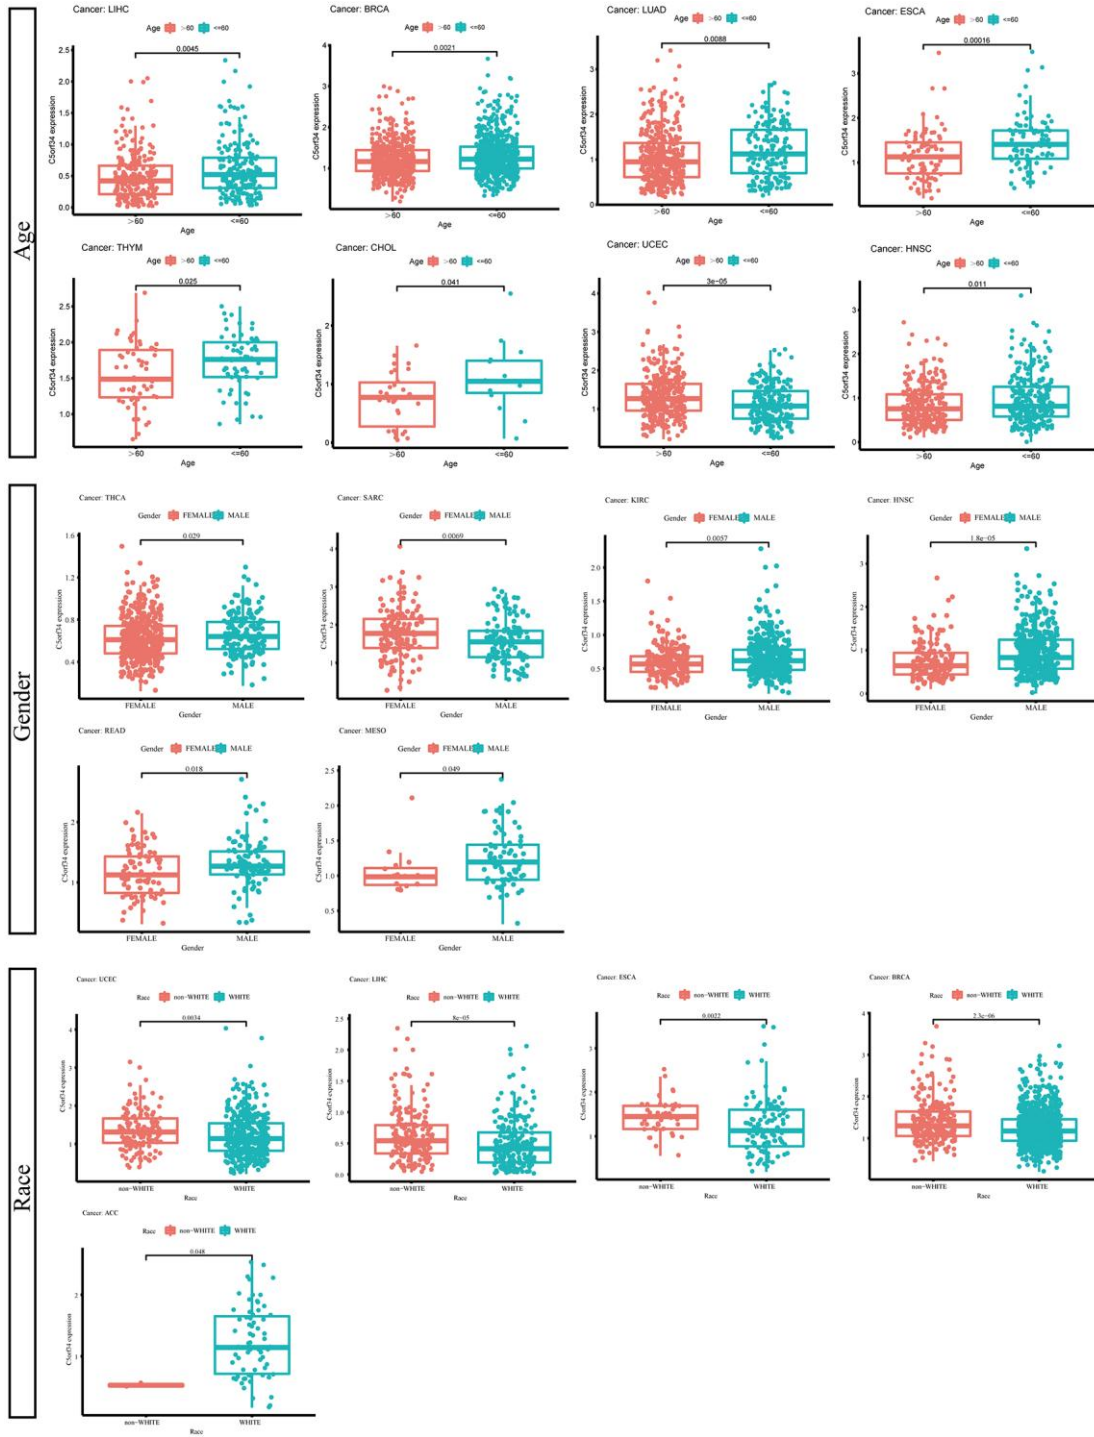

Supplementary Figure 1. Relationship of C5orf34 expression with gender, age, and race in cancers.

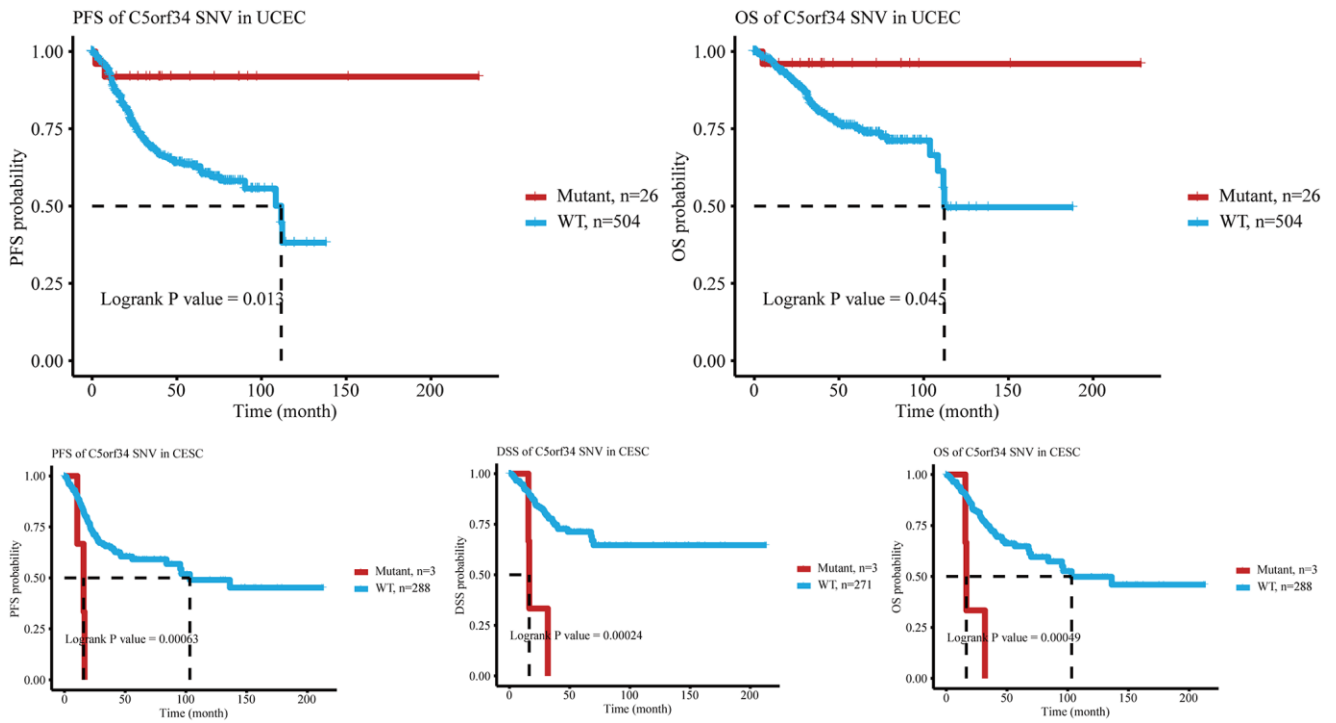

**Supplementary Figure 2. Relationship of C5orf34 single-nucleotide variant with prognosis in UCEC and CESC.**

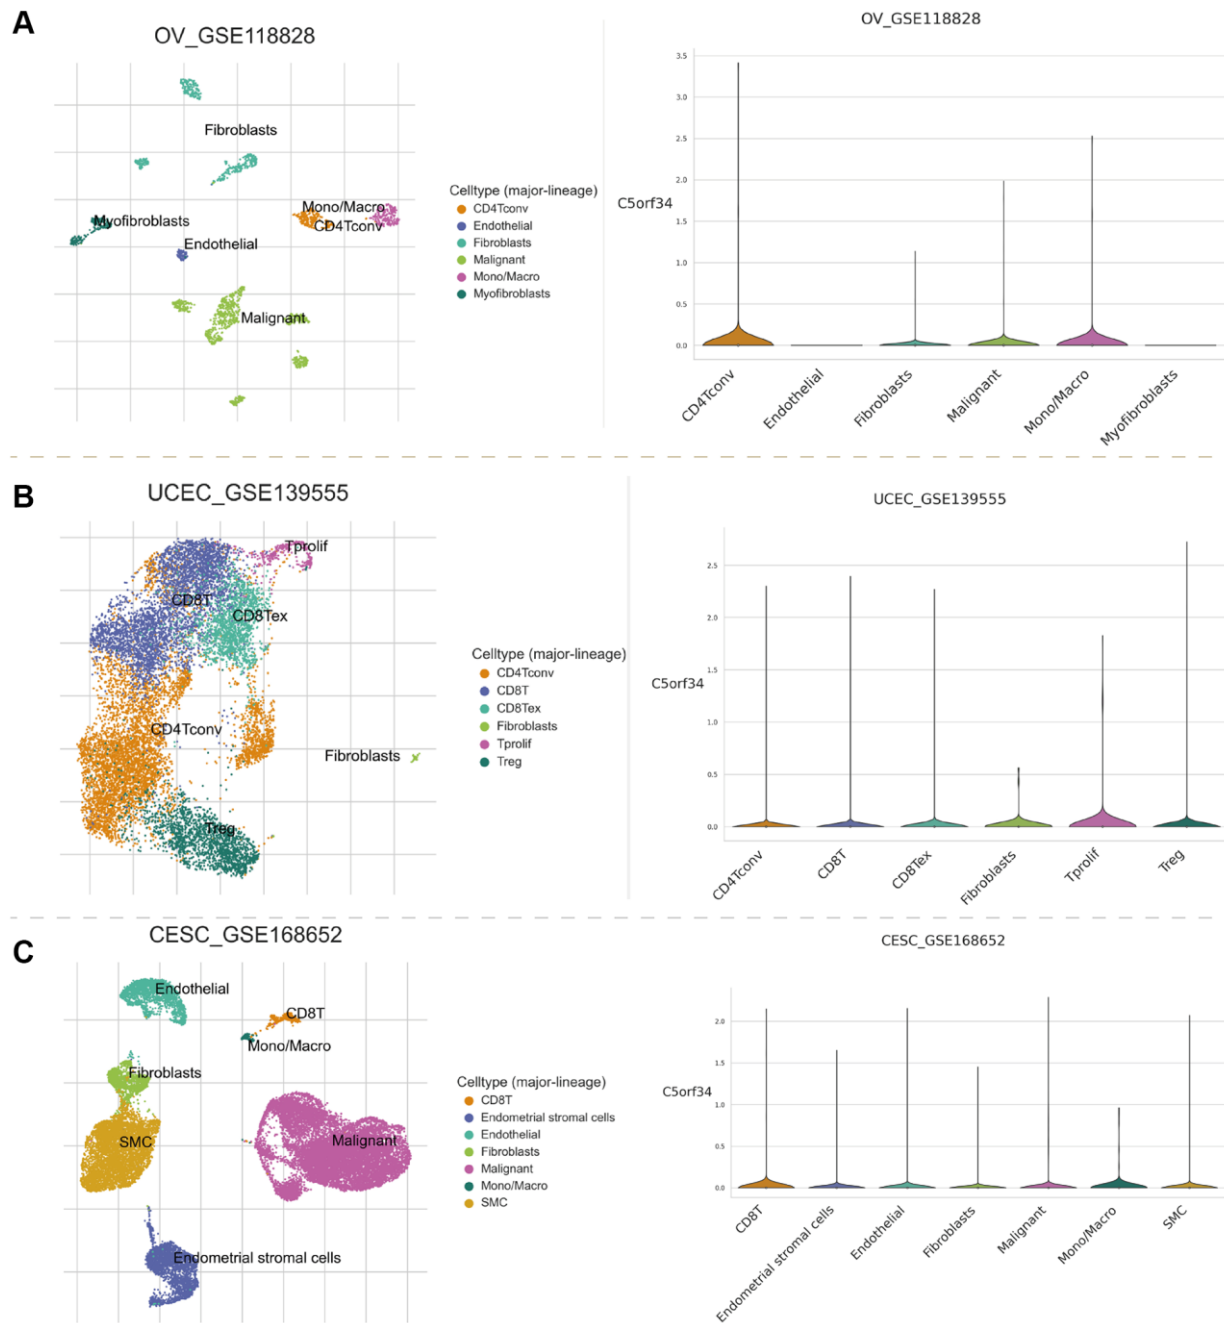

**Supplementary Figure 3.** Single-cell analysis of C5orf34 in (A) OV, (B) UCEC, and (C) CESC based on TISCH2 platform.
